# Supplementary material for: Low expression levels of hepsin and TMPRSS3 are associated with poor breast cancer survival
Source: Springer Nature journal article supplement (doi:10.1186/s12885-015-1440-5), 2015-05-26
Supplement: MOESM1 [file 9744662]

**Supplementary Table S1.** Significant clinical variables associated with hepsin and TMPRSS3 protein expression

| Clinical variable (%) | Protein expression <sup>a</sup> |                     |                              | OR (95 % CI) <sup>c</sup>  |
|-----------------------|---------------------------------|---------------------|------------------------------|----------------------------|
|                       | Low                             | Moderate/high, Ref. | P <sup>b</sup>               |                            |
| <b>Hepsin</b>         |                                 |                     |                              |                            |
| Tumor grade           |                                 |                     | <b>0.0004<sup>b</sup></b>    |                            |
| I                     | 28 (32.2)                       | 59 (67.8)           |                              | Ref.                       |
| II                    | 76 (46.9)                       | 86 (53.1)           | <b>0.025</b>                 | <b>1.862 (1.079-3.213)</b> |
| III                   | 64 (61.0)                       | 41 (39.0)           | <b>0.00009</b>               | <b>3.289 (1.811-5.973)</b> |
| Tumor stage           |                                 |                     | <b>0.015<sup>b</sup></b>     |                            |
| I                     | 48 (39.7)                       | 73 (60.3)           |                              | Ref.                       |
| II                    | 91 (49.5)                       | 93 (50.5)           | 0.094                        | 1.488 (0.935-2.369)        |
| III, IV               | 29 (64.4)                       | 16 (35.6)           | <b>0.005</b>                 | <b>2.757 (1.354-5.611)</b> |
| Tumor size            |                                 |                     | <b>0.025<sup>b</sup></b>     |                            |
| T1                    | 72 (41.6)                       | 101 (58.4)          |                              | Ref.                       |
| T2                    | 86 (53.8)                       | 74 (46.2)           | <b>0.027</b>                 | <b>1.630 (1.057-2.515)</b> |
| T3, T4                | 21 (61.8)                       | 13 (38.2)           | <b>0.034</b>                 | <b>2.266 (1.065-4.821)</b> |
| Nodal status          |                                 |                     | <b>0.010<sup>b</sup></b>     |                            |
| Negative              | 82 (41.6)                       | 115 (58.4)          |                              | Ref.                       |
| Positive              | 86 (55.5)                       | 69 (44.5)           | <b>0.010</b>                 | <b>1.748 (1.143-2.674)</b> |
| <b>TMPPSS3</b>        |                                 |                     |                              |                            |
| Tumor grade           |                                 |                     | <b>0.0000008<sup>b</sup></b> |                            |
| I                     | 29 (33.0)                       | 59 (67.0)           |                              | Ref.                       |
| II                    | 85 (52.8)                       | 76 (47.2)           | <b>0.002</b>                 | <b>2.341 (1.364-4.018)</b> |
| III                   | 75 (70.8)                       | 31 (29.2)           | <b>0.0000002</b>             | <b>5.006 (2.721-9.209)</b> |
| Tumor stage           |                                 |                     | <b>0.007<sup>b</sup></b>     |                            |
| I                     | 51 (41.8)                       | 71 (58.2)           |                              | Ref.                       |
| II                    | 109 (59.2)                      | 75 (40.8)           | <b>0.002</b>                 | <b>2.109 (1.328-3.348)</b> |
| III, IV               | 27 (60.0)                       | 18 (40.0)           | <b>0.028</b>                 | <b>2.176 (1.086-4.361)</b> |
| Tumor size            |                                 |                     | <b>0.002<sup>b</sup></b>     |                            |
| T1                    | 79 (45.4)                       | 95 (54.6)           |                              | Ref.                       |
| T2                    | 102 (63.8)                      | 58 (36.2)           | <b>0.00083</b>               | <b>2.115 (1.363-3.281)</b> |
| T3, T4                | 16 (45.7)                       | 19 (54.3)           | 0.973                        | 1.013 (0.489-2.099)        |
| PR status             |                                 |                     | <b>0.022<sup>b</sup></b>     |                            |
| Negative              | 87 (61.7)                       | 54 (38.3)           | <b>0.017</b>                 | <b>1.679 (1.098-2.568)</b> |
| Positive              | 103 (48.8)                      | 108 (51.2)          |                              | Ref.                       |
| ER/PR/HER2 status     |                                 |                     | <b>0.022<sup>b</sup></b>     |                            |
| Triple-negative       | 30 (69.8)                       | 13 (30.2)           | <b>0.022</b>                 | <b>2.244 (1.125-4.477)</b> |
| Non-triple-negative   | 146 (50.7)                      | 142 (49.3)          |                              | Ref.                       |
| Histological type     |                                 |                     | 0.060 <sup>b</sup>           |                            |
| Ductal                | 131 (55.3)                      | 106 (44.7)          | <b>0.031</b>                 | <b>1.760 (1.053-2.942)</b> |
| Lobular               | 43 (59.7)                       | 29 (40.3)           | <b>0.024</b>                 | <b>2.112 (1.105-4.037)</b> |
| Other malignant       | 26 (40.6)                       | 38 (59.4)           |                              | Ref.                       |

NS, not significant; Ref., reference category in the logistic regression analysis

<sup>a</sup>The median value of protein expression was used in the analyses.

<sup>b</sup>*P* value assessed by Fisher's exact test. Other *P* values from logistic regression analysis.

<sup>c</sup>OR and 95% CI values for association from logistic regression analysis.
