# Supplementary material for: Low expression levels of hepsin and TMPRSS3 are associated with poor breast cancer survival
Source: Springer Nature journal article supplement (doi:10.1186/s12885-015-1440-5), 2015-05-26

# Supplementary Figure S2

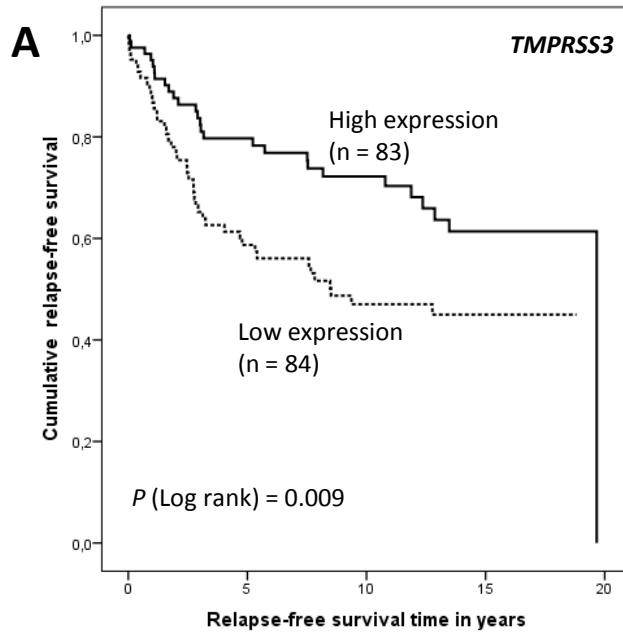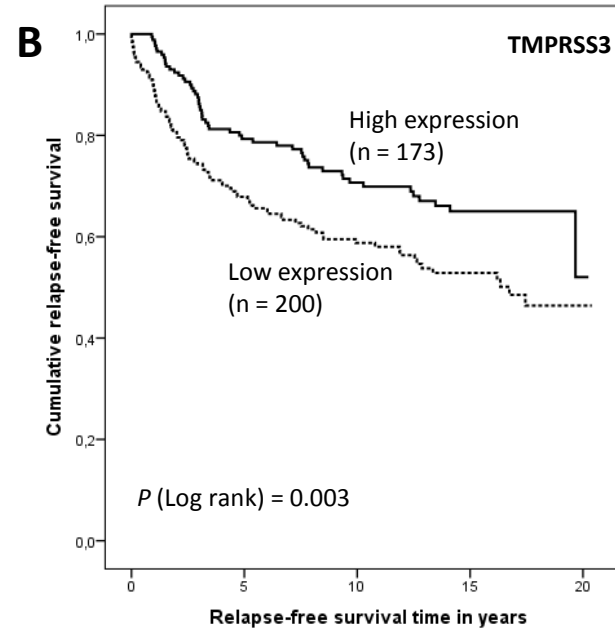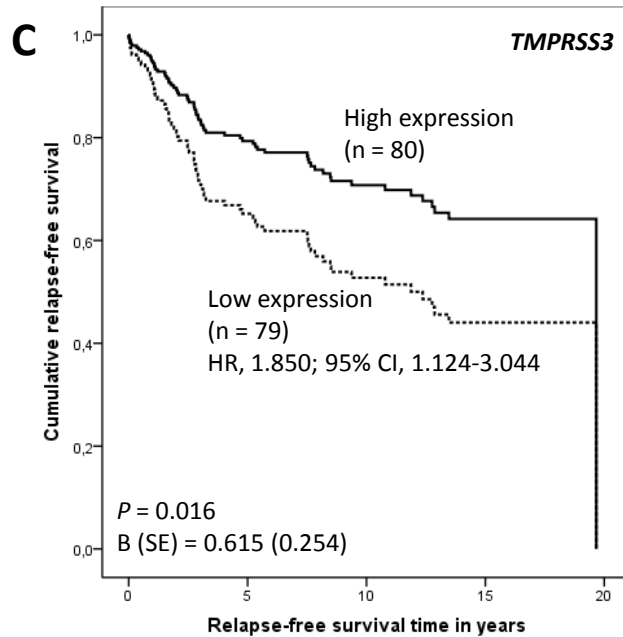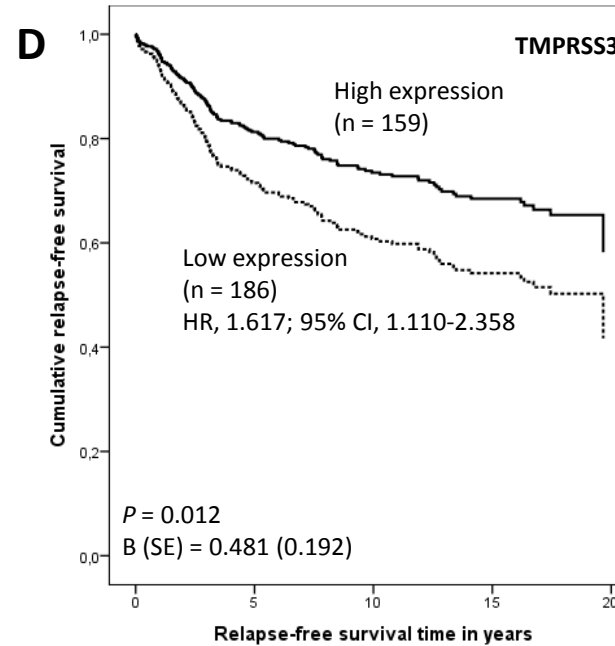

Supplement: MOESM3 [file 9744662]
