# Supplementary material for: Low expression levels of hepsin and TMPRSS3 are associated with poor breast cancer survival
Source: Springer Nature journal article supplement (doi:10.1186/s12885-015-1440-5), 2015-05-26
Supplement: MOESM5 [file 9744662]

**Supplementary Table S2.** Significant clinical variables associated with combined *TMPRSS1-TMPRSS3* mRNA and protein expression

| Clinical variable                                        | Low       | Others, Ref. | <i>P</i> <sup>b</sup>        | OR (95 % CI) <sup>c</sup>    |
|----------------------------------------------------------|-----------|--------------|------------------------------|------------------------------|
| <b>Combination of mRNA expression<sup>a</sup> (%)</b>    |           |              |                              |                              |
| Tumor grade                                              |           |              | <b>0.00018<sup>b</sup></b>   |                              |
| I, II                                                    | 15 (20.5) | 58 (79.5)    |                              | Ref.                         |
| III                                                      | 26 (54.2) | 22 (45.8)    | <b>0.0002</b>                | <b>4.570 (2.047 -10.200)</b> |
| ER status                                                |           |              | <b>0.001<sup>b</sup></b>     |                              |
| Negative                                                 | 22 (55.0) | 18 (45.0)    | <b>0.001</b>                 | <b>3.988 (1.779 - 8.944)</b> |
| Positive                                                 | 19 (23.5) | 62 (76.5)    |                              | Ref.                         |
| PR status                                                |           |              | <b>0.020<sup>b</sup></b>     |                              |
| Negative                                                 | 25 (45.5) | 30 (54.5)    | <b>0.015</b>                 | <b>2.604 (1.201 -5.645)</b>  |
| Positive                                                 | 16 (24.2) | 50 (75.8)    |                              | Ref.                         |
| HER2 status                                              |           |              | <b>0.027<sup>b</sup></b>     |                              |
| Negative                                                 | 27 (27.6) | 71 (72.4)    |                              | Ref.                         |
| Positive                                                 | 10 (55.6) | 8 (44.4)     | <b>0.024</b>                 | <b>3.287 (1.174 - 9.206)</b> |
| <b>Combination of protein expression<sup>a</sup> (%)</b> |           |              |                              |                              |
| Tumor grade                                              |           |              | <b>0.0000006<sup>b</sup></b> |                              |
| I                                                        | 10 (11.5) | 77 (88.5)    |                              | Ref.                         |
| II                                                       | 43 (26.7) | 118 (73.3)   | <b>0.007</b>                 | <b>2.806 (1.331-5.914)</b>   |
| III                                                      | 48 (45.7) | 57 (54.3)    | <b>0.0000015</b>             | <b>6.484 (3.025-13.900)</b>  |
| Tumor stage                                              |           |              | <b>0.0037<sup>b</sup></b>    |                              |
| I                                                        | 22 (18.3) | 98 (81.7)    |                              | Ref.                         |
| II                                                       | 61 (33.2) | 123 (66.8)   | <b>0.005</b>                 | <b>2.209 (1.268-3.848)</b>   |
| III, IV                                                  | 18 (40.0) | 27 (60.0)    | <b>0.005</b>                 | <b>2.970 (1.396-6.316)</b>   |
| Tumor size                                               |           |              | <b>0.004<sup>b</sup></b>     |                              |
| T1                                                       | 37 (21.5) | 135 (78.5)   |                              | Ref.                         |
| T2                                                       | 60 (37.5) | 100 (62.5)   | <b>0.002</b>                 | <b>2.189 (1.349-3.554)</b>   |
| T3, T4                                                   | 12 (35.3) | 22 (64.7)    | 0.088                        | 1.990 (0.902-4.393)          |
| Nodal status                                             |           |              | <b>0.0089<sup>b</sup></b>    |                              |
| Negative                                                 | 45 (23.0) | 151 (77.0)   |                              | Ref.                         |
| Positive                                                 | 56 (36.1) | 99 (63.9)    | <b>0.007</b>                 | <b>1.898 (1.190-3.028)</b>   |
| PR status                                                |           |              | <b>0.031<sup>b</sup></b>     |                              |
| Negative                                                 | 50 (35.7) | 90 (64.3)    | <b>0.026</b>                 | <b>1.699 (1.066-2.708)</b>   |
| Positive                                                 | 52 (24.6) | 159 (75.4)   |                              | Ref.                         |
| Histological type                                        |           |              | <b>0.012<sup>b</sup></b>     |                              |
| Ductal                                                   | 76 (32.2) | 160 (67.8)   | <b>0.007</b>                 | <b>2.850 (1.337-6.074)</b>   |
| Lobular                                                  | 24 (33.3) | 48 (66.7)    | <b>0.012</b>                 | <b>3.000 (1.271-7.083)</b>   |
| Other malignant                                          | 9 (14.3)  | 54 (85.7)    |                              | Ref.                         |

Ref., reference category in the logistic regression analysis

<sup>a</sup>The 'combined low group' included all cases with low expression levels of both genes.

<sup>b</sup>*P* value assessed by Fisher's exact test. Other *P* values from the logistic regression analysis.

<sup>c</sup>OR and 95% CI values for association from the logistic regression analysis.
